# Supplementary material for: Autocrine production of reproductive axis neuropeptides affects proliferation of canine osteosarcoma in vitro
Source: PubMed Central journal article supplement (PMC6379937; doi:10.1186/s12885-019-5363-4), 2019-02-18
Supplement: 12885_2019_5363_MOESM1_ESM.pdf [file 12885_2019_5363_MOESM1_ESM.pdf]

# Supp Figure 1

## A Kisspeptin nucleotide species comparison

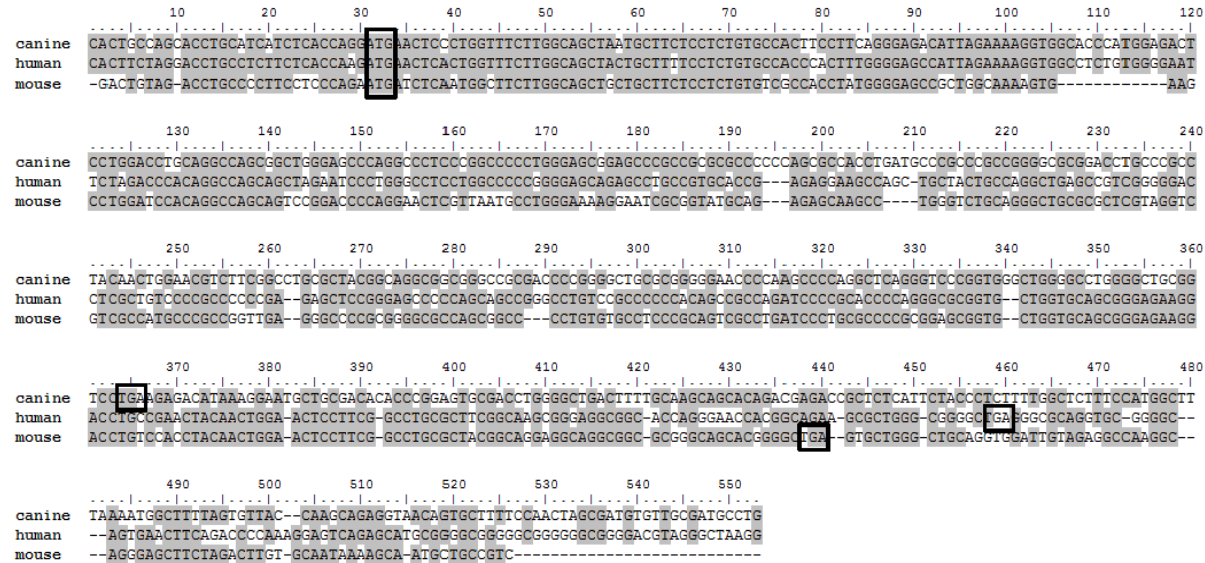

Start and stop codons

## B Kisspeptin amino acid species comparison

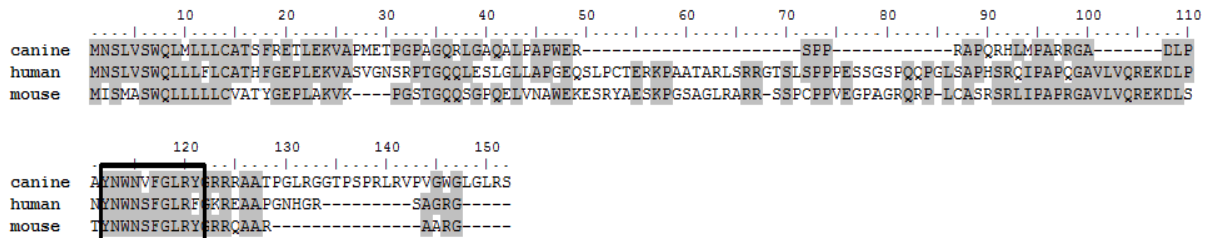

KP10
