# Supplementary material for: Autocrine production of reproductive axis neuropeptides affects proliferation of canine osteosarcoma in vitro
Source: Springer Nature journal article supplement (doi:10.1186/s12885-019-5363-4), 2019-02-18
Supplement: MOESM2 [file 16488758]

**Supplemental Table 1.** Nucleotide sequences of specific PCR primers

| <b>Gene</b>     | <b>Primer Sequence 5' – 3'</b>                         | <b>Product Size</b> |
|-----------------|--------------------------------------------------------|---------------------|
| <i>cKiss1</i>   | F: GAAAAGGTGGCACCCATGGAGA<br>R: GCCGAAGACGTTCCAGTTGTAG | 165 bp              |
| <i>cKiss1R</i>  | F: CGCCACCTGTGCCTGCTA<br>R: CCGCTCTGCCAGCAGCTG         | 106 bp              |
| <i>cGnrh</i>    | F: GGCCAACACTGGTCCTATGG<br>R: CCTCTTCAATCAGACTTTCCAGA  | 190 bp              |
| <i>cGnrhr</i>   | F: CCCCAGCCTTCATGATGGT<br>R: GGGATGATGAAGAGGCAGC       | 289 bp              |
| <i>cHtr1B</i>   | F: ACCTGCTCGTCTCCATCCT<br>R: TCCGACGACAGCCACAAGTC      | 103 bp              |
| <i>cHtr2A</i>   | F: CCCATTCTTCATCACGAACAT<br>R: GGAGAGGTAACCGATCCAGAC   | 106 bp              |
| <i>cRANK</i>    | F: CATTTCGGACGGTGCTGTAA<br>R: AAGTATTCATCCGGGCCACA     | 107 bp              |
| <i>cRANKL</i>   | F: CACTGACATCCCATCTGGTTC<br>R: CATTGCTGAAAGTCATGTTGGA  | 95 bp               |
| <i>cOPG</i>     | F: GGAGCTTGAGTTCTGCCTGAA<br>R: GGGTGCTTTAGATGACGTCTCA  | 139 bp              |
| <i>cβ-Actin</i> | F: GGACCTGACCGACTACCTCAT<br>R: GGGCAGCTCATAGCTCTTCTC   | 181 bp              |
| <i>cYWHAZ</i>   | F: AGCCTGCTCTCTTGCAAAGAC<br>R: GGGTATCCGATGTCCACAATG   | 137 bp              |

<sup>1</sup>YWHAZ was used as a housekeeping gene to access quality of cDNA and to provide normalization standard for qPCR
